# Supplementary material for: Advancing Nanoscale Science: Synthesis and Bioprinting of Zeolitic Imidazole Framework-8 for Enhanced Anti-Infectious Therapeutic Efficacies
Source: MDPI journal article supplement (doi:10.3390/biomedicines11102832), 2023-10-18

# SI data

## Advancing Nanoscale Science: Synthesis and Bioprinting of Zeolitic Imidazole Framework-8 for Enhanced Anti-infectious Therapeutic Efficacies

Muhammad Saqib Saif<sup>1</sup>, Murtaza Hasan<sup>2,3\*</sup>, Ayesha Zafar<sup>4</sup>, Muhammad Mahmood Ahmad<sup>5</sup>,  
Tuba Tariq<sup>1</sup>, Muhammad Waqas<sup>2</sup>, Riaz Hussain<sup>6</sup>, Amina Zafar<sup>5</sup>, Xue Huang<sup>3\*\*</sup>, Xugang Shu<sup>3\*\*\*</sup>

<sup>1</sup>Faculty of Chemical and Biological Science, Department of Biochemistry, The Islamia University of Bahawalpur, 63100, Pakistan

<sup>2</sup>Faculty of Chemical and Biological Science, Department of Biotechnology, The Islamia University of Bahawalpur, 63100, Pakistan

<sup>3</sup>School of Chemistry and Chemical Engineering, Zhongkai University of Agriculture and Engineering, Guangzhou, 510225, P.R. China

<sup>4</sup>School of Engineering, Royal Melbourne Institute of Technology (RMIT) University Melbourne, 124 La Trobe Street, Melbourne, VIC 3001, Australia

<sup>5</sup>Faculty of Chemical and Biological Science, Department of Bioinformatics, The Islamia University of Bahawalpur, 63100, Pakistan

<sup>6</sup>Faculty of Chemical and Biological Science, Department of Veterinary Sciences, The Islamia University of Bahawalpur, 63100, Pakistan

### **AUTHOR INFORMATION**

#### **Corresponding Authors:**

**Dr Murtaza Hasan\***

**Email: murtaza@zhku.edu.cn**

**Prof Xugang Shu\*\***

**Email: xgshu@21cn.com**

**Phone: 86-020-8900-3114.**

**Fax: 86-020-8900-3114**

**Table S1.** (a,b) Nano-size calculation using Scherrer equation (a) ZIF-8, (b) CME@ZIF-8.

| <b>(a)</b> | Peak number | Pos. (2 $\theta$ ) | Intensity | FWHM left (2 $\theta$ ) | $\beta$ (rad) | Size (nm) | Average size (nm) |
|------------|-------------|--------------------|-----------|-------------------------|---------------|-----------|-------------------|
|            | 1           | 7.8086             | 118.336   | 10.07412                | 0.175826      | 0.789308  | 11.38424          |
|            | 2           | 10.24216           | 724.617   | 0.45702                 | 0.007976      | 17.45247  |                   |
|            | 3           | 12.74844           | 717.996   | 0.35112                 | 0.006128      | 22.76631  |                   |
|            | 4           | 14.71232           | 1247.707  | 0.59133                 | 0.010320      | 13.5461   |                   |
|            | 5           | 18.64383           | 711.375   | 0.53906                 | 0.009408      | 14.93453  |                   |
|            | 6           | 20.07974           | 114.431   | 0.65821                 | 0.011487      | 12.24421  |                   |
|            | 7           | 20.07974           | 61.460    | 61.21047                | 1.068324      | 0.311805  |                   |
|            | 8           | 27.14889           | 485.738   | 0.62562                 | 0.010919      | 13.06318  |                   |
|            | 9           | 29.77154           | 223.938   | 1.09162                 | 0.019052      | 7.530238  |                   |
| <b>(b)</b> | Peak number | Pos. (2 $\theta$ ) | Intensity | FWHM left (2 $\theta$ ) | $\beta$ (rad) | Size (nm) | Average size (nm) |
|            | 1           | 10.1201            | 701.612   | 0.38386                 | 0.006699      | 20.22677  | 12.4482           |
|            | 2           | 12.99014           | 719.650   | 0.5258                  | 0.009176      | 15.20656  |                   |
|            | 3           | 14.33409           | 2659.380  | 0.36962                 | 0.006451      | 21.66238  |                   |
|            | 4           | 18.21586           | 723.896   | 0.38988                 | 0.006804      | 20.63643  |                   |
|            | 5           | 18.21586           | 48.599    | 8.8834                  | 0.155044      | 0.905704  |                   |
|            | 6           | 18.21586           | 145.161   | 1134.3144               | 19.797521     | 0.007093  |                   |
|            | 7           | 26.78703           | 289.387   | 0.42156                 | 0.007357      | 19.37185  |                   |
|            | 8           | 30.00994           | 26.315    | 8.07282                 | 0.140897      | 1.018817  |                   |

**Figure S1.** EDX analysis of (a) ZIF-8, (b) CME@ZIF-8

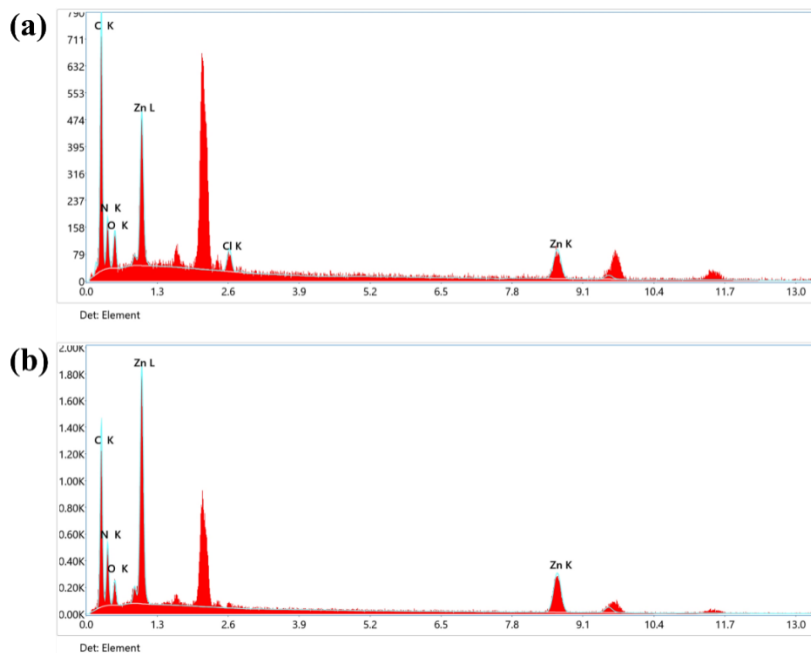

Supplement: s1 [file s1]
